# Supplementary material
Source: PubMed Central journal article supplement (PMC4983217)
Supplement: NIHMS800234-supplement-216_2016_9716_MOESM1_ESM.pdf [file NIHMS800234-supplement-216_2016_9716_MOESM1_ESM.pdf]

## **Analytical and Bioanalytical Chemistry**

### **Electronic Supplementary Material**

#### **Evaluation of coverage, retention patterns, and selectivity of seven liquid chromatographic methods for metabolomics**

Stefanie Wernisch, Subramaniam Pennathur

##### **ESM I**

1. Liquid chromatographic (LC) and mass spectrometric (MS) conditions
2. Retention factor distributions
3. Method orthogonality
4. Coverage of metabolite library subgroups

##### **ESM II (separate file)**

5. Metabolite library – full list of retention times and retention factors

216\_2016\_9716\_MOESM2\_ESM.xlsx

## ESM I

### 1. Liquid chromatographic (LC) and mass spectrometric (MS) conditions

#### 1.1 General MS Conditions:

Source: Dual Electrospray Ionization

|                   |                                       |
|-------------------|---------------------------------------|
| Polarity          | Positive (negative in method B)       |
| Gas temperature   | 325 °C (C, D: 350 °C, E: 300 °C)      |
| Drying gas        | 10 L/min (C, D: 12 L/min, E: 8 L/min) |
| Nebulizer         | 45 psig (C/D: 50 psig, E: 30 psig)    |
| Sheath Gas Temp   | 400 °C                                |
| Sheath Gas Flow   | 12 L/min                              |
| Capillary Voltage | 4000 V (B, E: 3500 V)                 |
| MS-TOF Fragmentor | 140 V                                 |
| Skimmer           | 65 V                                  |
| Mass range        | 50-1000 m/z                           |
| Acquisition rate  | 2 spectra/sec                         |

## 1.2 LC gradients

**Table S1** Columns and mobile phase conditions for methods A-G. \* Note that methods C and D utilize the same column but different mobile phase modes

| Column                               | A                                                                           | B                                                                         | C*                                               | D*                                                             | E                                                                | F                                                                           | G                                                                         |
|--------------------------------------|-----------------------------------------------------------------------------|---------------------------------------------------------------------------|--------------------------------------------------|----------------------------------------------------------------|------------------------------------------------------------------|-----------------------------------------------------------------------------|---------------------------------------------------------------------------|
| <b>Commercial Name</b>               | Waters Acquity UPLC HSS T3                                                  | SeQuant ZIC pHILIC                                                        | Dionex Acclaim MM HILIC-1                        | Dionex Acclaim MM HILIC-1                                      | SeQuant ZIC cHILIC                                               | Waters XBridge Amide                                                        | Tosoh TSKgel NH2-100                                                      |
| <b>Type</b>                          | RP                                                                          | Zwitterionic HILIC                                                        | Mixed-mode („neutral“), RP conditions            | Mixed-mode („neutral“), HILIC conditions                       | Zwitterionic HILIC                                               | “neutral” HILIC                                                             | „ion-exchange“ HILIC                                                      |
| <b>Surface modification</b>          | C18                                                                         | sulfobetaine                                                              | alkyl diol                                       | alkyl diol                                                     | phosphorylcholine                                                | amide                                                                       | alkylamine                                                                |
| <b>Dimensions/mm</b>                 | 2.1 x 100                                                                   | 2.1 x 150                                                                 | 4.6 x 150                                        | 4.6 x 150                                                      | 2.1 x 150                                                        | 3.0 x 150                                                                   | 2.0 x 150                                                                 |
| <b>Particle size/μm</b>              | 1.8                                                                         | 5                                                                         | 5                                                | 5                                                              | 3                                                                | 3.5                                                                         | 5                                                                         |
| <b>Temperature / °C</b>              | 55                                                                          | 45                                                                        | 30                                               | 30                                                             | 40                                                               | 40                                                                          | 40                                                                        |
| <b>Flow rate/μL*min<sup>-1</sup></b> | 450                                                                         | 300                                                                       | 700                                              | 700                                                            | 300                                                              | 700                                                                         | 200                                                                       |
| <b>Mobile phases A/B</b>             | H <sub>2</sub> O/MeOH                                                       | H <sub>2</sub> O/ACN                                                      | H <sub>2</sub> O /ACN                            | H <sub>2</sub> O /ACN                                          | H <sub>2</sub> O /ACN                                            | H <sub>2</sub> O/ACN                                                        | H <sub>2</sub> O /ACN                                                     |
| <b>Ionic additive (channel)</b>      | 0.1 % FA (A&B)                                                              | 20 mM (NH <sub>4</sub> ) <sub>2</sub> CO <sub>3</sub> (A)                 | 0.1 % FA (A&B)                                   | 0.1% FA (A&B)                                                  | 20 mM NH <sub>4</sub> OAc (A&B)                                  | 0.1 % FA (A & B)                                                            | 0.1 % FA (A)                                                              |
| <b>Flow rate/μL*min<sup>-1</sup></b> | <b>450</b>                                                                  | <b>300</b>                                                                | <b>700</b>                                       | <b>700</b>                                                     | <b>300</b>                                                       | <b>700</b>                                                                  | <b>200</b>                                                                |
| <b>Gradient</b>                      | min – % B<br>0 - 2<br>20 – 75<br>22 – 98<br>30 – 98<br>30.1 – 2<br>37.1 – 2 | min – % B<br>0 – 95<br>2 – 95<br>15 – 60<br>17 – 60<br>17.1 – 5<br>27 – 5 | min – % B<br>0– 5<br>30 – 75<br>31 – 5<br>40 – 5 | min – %B<br>0 – 97<br>20 – 50<br>30 – 50<br>31 – 97<br>40 – 97 | min – %B<br>0 – 80<br>15 - 20<br>20 – 20<br>20.1 – 50<br>30 – 50 | min – %B<br>0 – 95<br>1.5 – 95<br>20 – 50<br>25 – 50<br>25.1– 95<br>35 – 95 | min – %B<br>0– 90<br>2 – 90<br>17 – 50<br>22 – 50<br>22.1 – 90<br>32 – 90 |
| <b>Calculated t<sub>0</sub>/min</b>  | 0.62                                                                        | 1.39                                                                      | 2.84                                             | 2.84                                                           | 1.39                                                             | 1.2                                                                         | 1.9                                                                       |
| <b>MS mode</b>                       | <b>ESI+</b>                                                                 | <b>ESI-</b>                                                               | <b>ESI+</b>                                      | <b>ESI+</b>                                                    | <b>ESI+</b>                                                      | <b>ESI+</b>                                                                 | <b>ESI+</b>                                                               |

## 2. Retention factor distributions

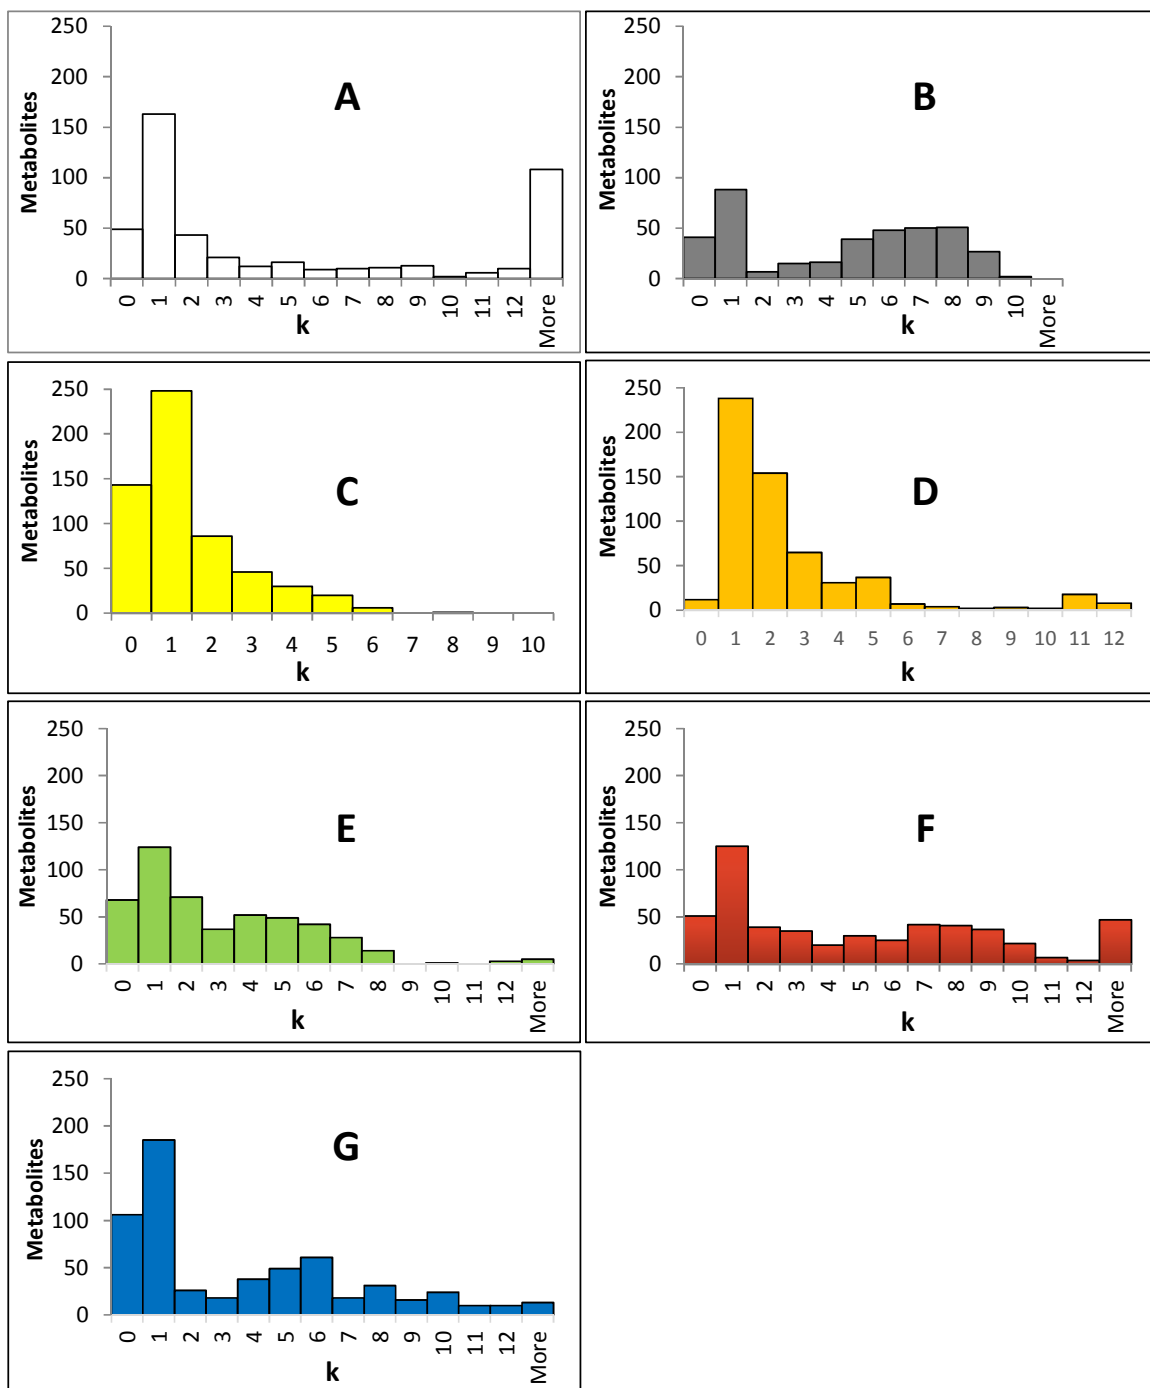

**Fig. S1** Retention profiles for RP (A, C) and HILIC (B, D-G) methods based on retention factors of detected metabolite library compounds. Chromatographic conditions according to Table S1

### 3. Complementarity of HILIC methods

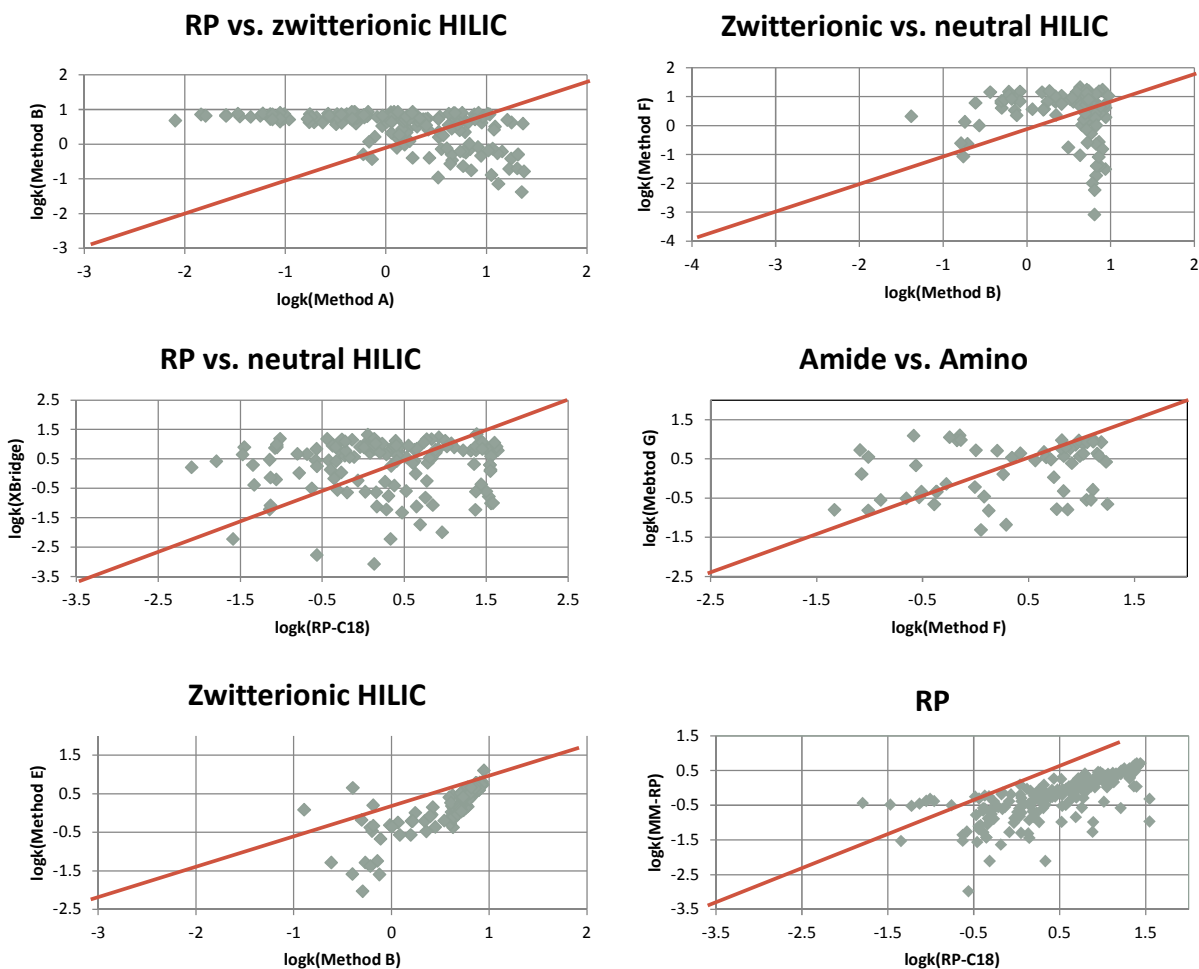

**Fig. S2** Estimation of method orthogonality for RP and HILIC methods from plots of logarithmic retention factors. The deviation from the diagonal is larger for methods having high orthogonality (e.g., A/B or B/F, top row) compared to methods with similar selectivity (B/E, A/C, bottom row). Note that this comparison includes only compounds detected with both of the two methods being compared

## 4. Selectivity for metabolite library subgroups

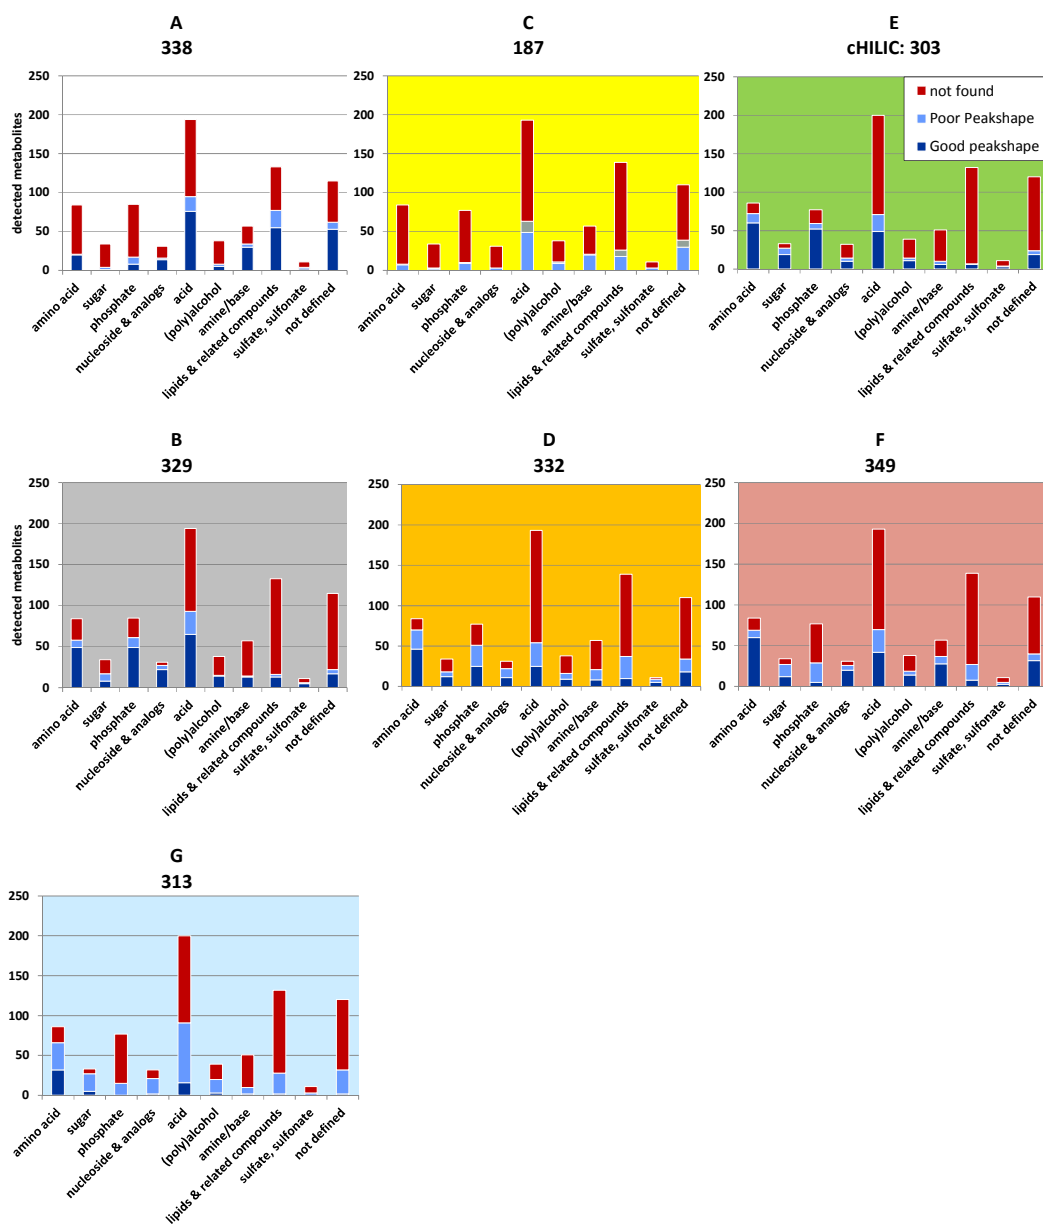

**Fig. S3** Metabolite subgroups and their retention on columns A-G. The numbers on top of each panel denote total number of identified metabolites from the library of 714. Dark blue segments signify good and light blue segments signify poor peakshape (double/multiple, split, broad or tailing peaks). Missing fraction is shown as red segments. See Table S1 for method description and Supporting Information II (xlsx file) for full list of library compound classification and results
